# Supplementary material
Source: publisher figshare collection journal article supplement (https://acs.figshare.com/ndownloader/files/4143253)
Supplement: Supplementary file 1 [file 4143253]

## SUPPORTING INFORMATION

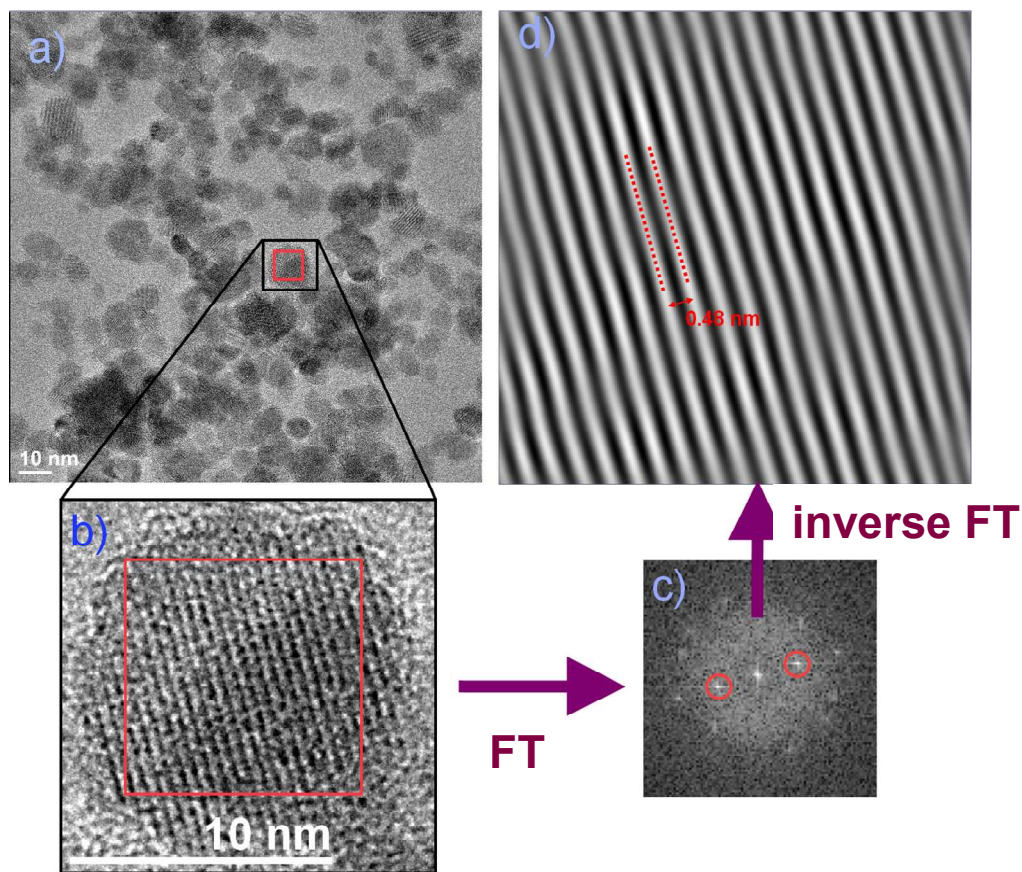

Crude  $\gamma$ - $\text{Fe}_2\text{O}_3$  nanoparticles (Fe90 sample) : High-resolution TEM image along the  $[111]$  zone axis of a selected particle (b) with the corresponding Fourier transform (c). Image calculation by inverse Fourier transform for the indicated spots in Fourier space.

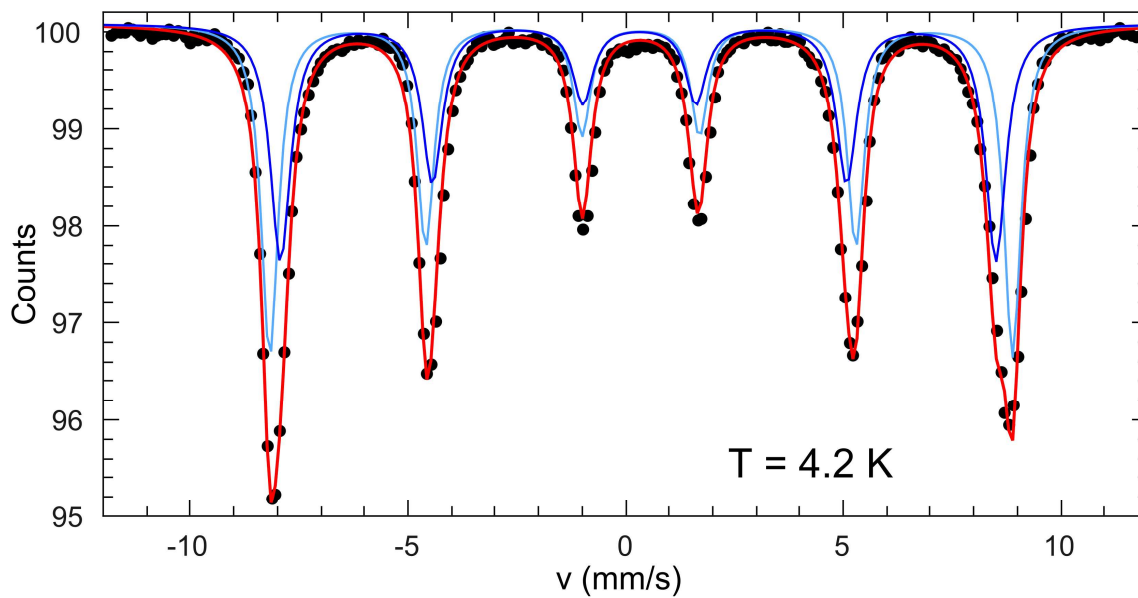

Mössbauer absorption spectrum measured at 4.2 K for the  $\text{Fe}_2\text{O}_3/\text{SiO}_2$  composite sample dried at  $90^\circ\text{C}$  ( $\text{Fe}/\text{Si} = 0.25$ ). The spectrum was fitted to the sum of 2 subspectra.

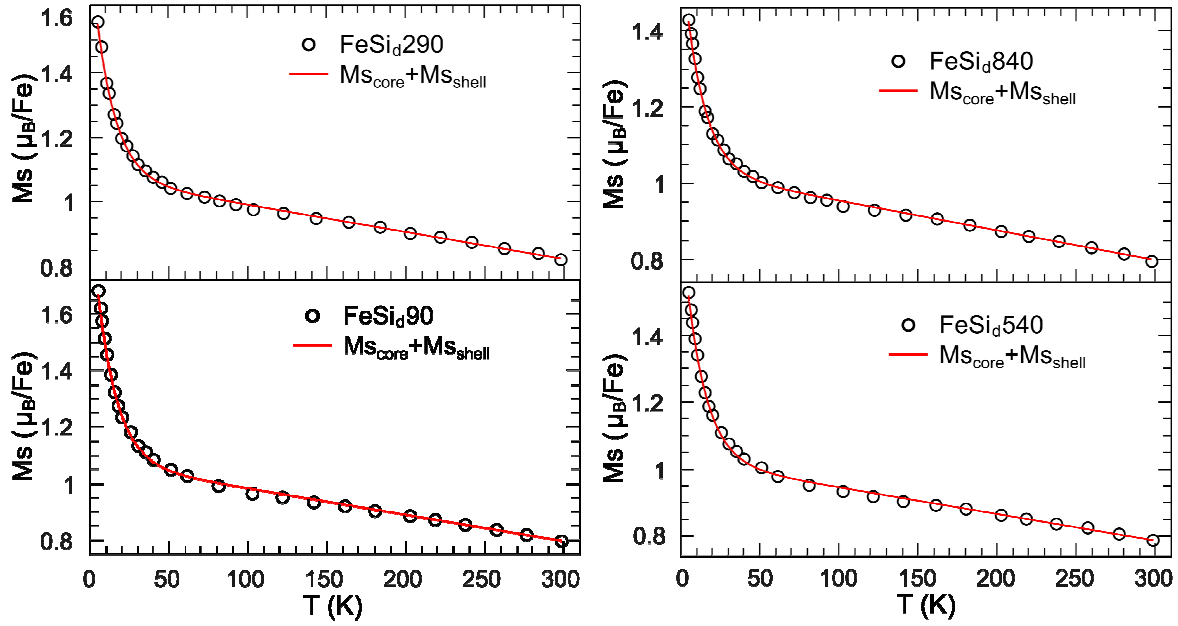

Magnetization value under 5 T as a function of temperature for the  $\text{Fe}_2\text{O}_3/\text{SiO}_2$  composite samples dried at 90°C and annealed at 290, 540 and 840°C (Fe/Si = 0.01). The solid line correspond to a fit to Eq. (3)

### Description of Equation (3)

At high temperature, surface spins fluctuate along different orientations giving rise to a paramagnetic-like contribution, which is much smaller than the volume contribution. When the temperature is lowered, these spins are frozen along a radial direction, leading to a throttled structure with increased magnetization as compared to the high-temperature data. The contribution of these surface spins to saturation magnetization can be fitted to the following expression:<sup>1,2</sup>

$$M_{S_{\text{shell}}}(T) = M_{S_{\text{shell}}}(0) \cdot e^{-\frac{T}{T_f}}$$

where  $T_f$  is the freezing temperature of the surface spins.

In contrast, the saturation magnetization of the core part should follow a  $T^{3/2}$  Bloch law.<sup>1,3</sup> However in nanoparticulate-based systems, as magnon energy levels are quantified due to finite size effects, the Bloch law can be simplified. Because of the energy gap between the uniform mode ( $E_0$ ) and higher energy modes ( $E_n$ ,  $n \geq 1$ ), the contribution of the  $E_0$  mode will be predominant. It results in a linear temperature dependence of the saturation magnetization,<sup>4</sup> so that the core contribution to  $M_s$  can be expressed as:

$$M_{S_{\text{core}}}(T) = M_{S_{\text{core}}}(0) + a \cdot T$$

The sum of these two equations has been used to model the experimental  $M_s$  versus  $T$  curves for the  $\text{Fe}_2\text{O}_3/\text{SiO}_2$  composite samples studied in the present work.

<sup>1</sup> Shendruk, T. N.; Desautels, R. D.; Southern, B. W.; van Lierop, J., *Nanotechnology* **2007**, *18*, 455704

<sup>2</sup> Adebayo, K.; Southern, B. W., arXiv:1002.4648v2

<sup>3</sup> Mandal, K.; Mitra, S.; Kumar, P. A., *Europhys. Lett.* **2006**, *75*, 618.

<sup>4</sup> Morup, S., *Europhys. Lett.* **2007**, *77*, 27003.
